# Supplementary material for: Marine Biotoxins in Whole and Processed Scallops from the Argentine Sea
Source: MDPI journal article supplement (doi:10.3390/md20100634), 2022-10-10

## Supplementary Figure S1

Example MRM chromatograms illustrating chromatographic separation and detection of PST analogues from a mid-level calibration standard prepared in shellfish extract

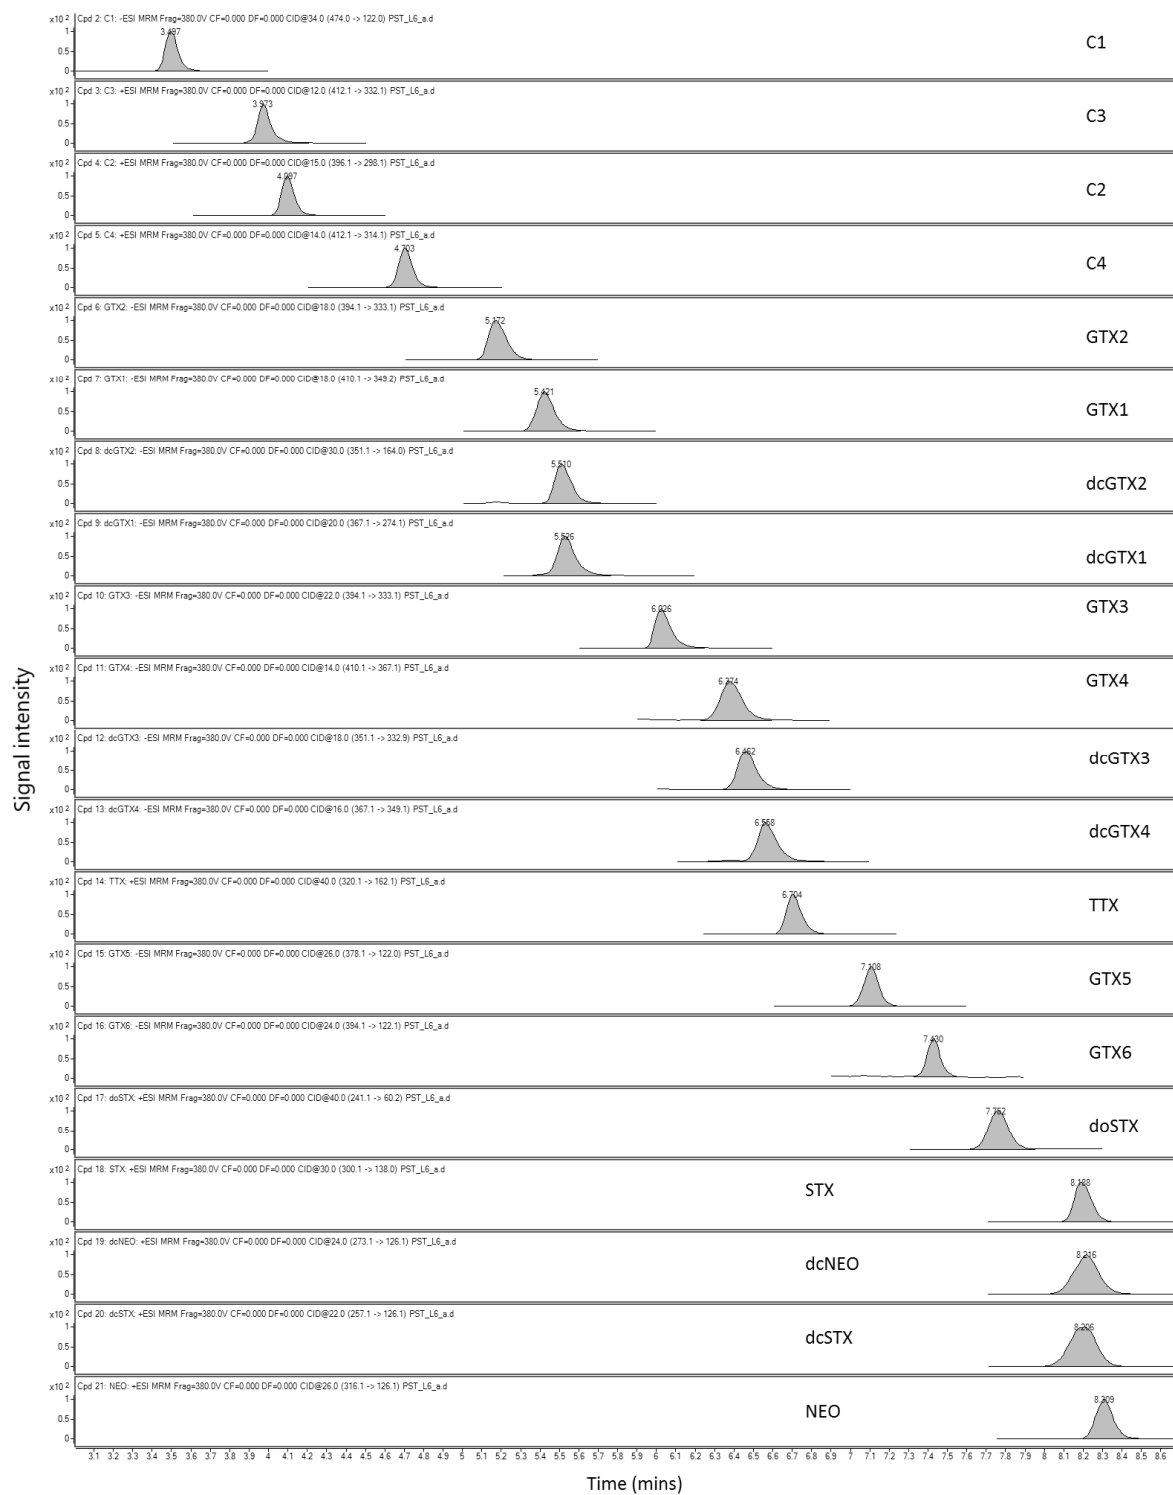

### Supplementary Figure S2

Example MRM chromatograms illustrating chromatographic separation and detection of LT analogues from a mid-level calibration standard prepared in shellfish extract

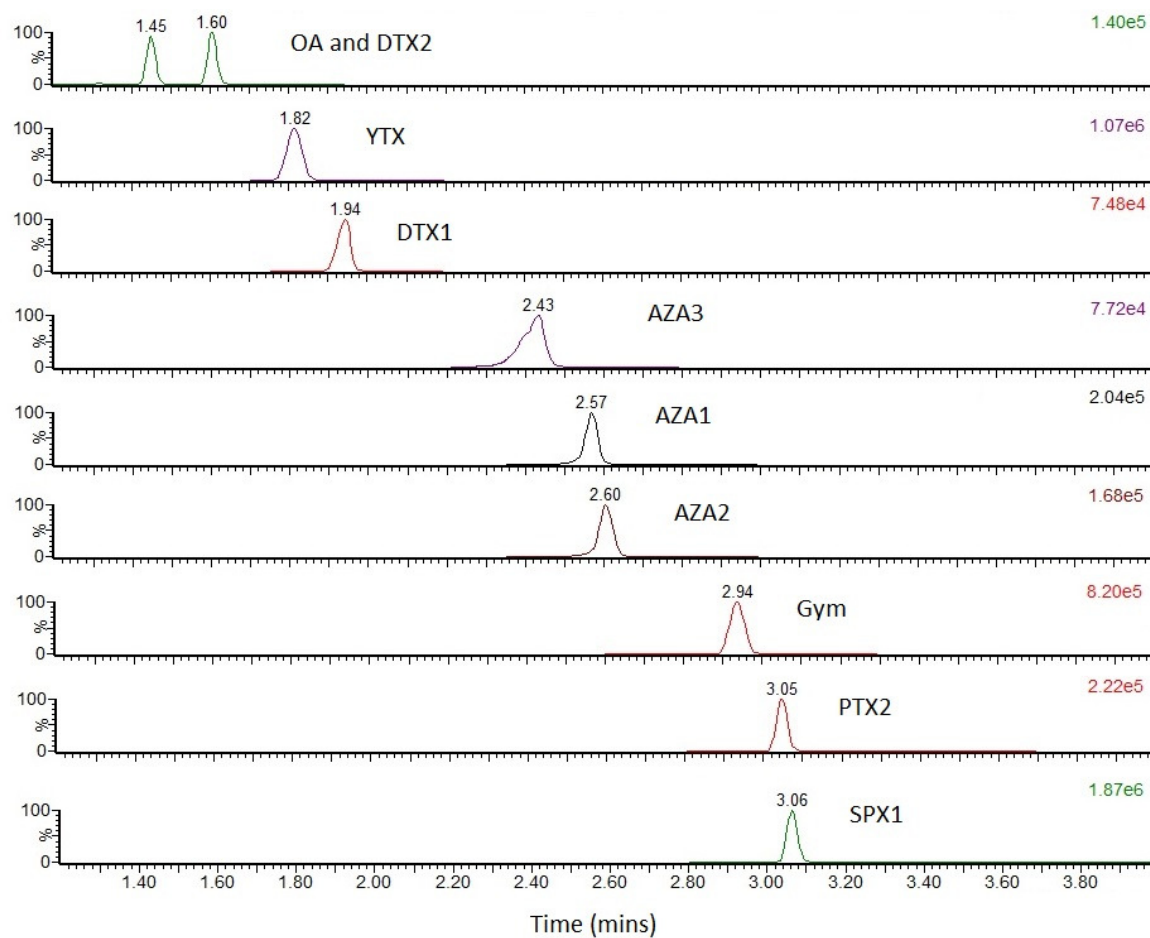

**Figure S3.** LC-UV chromatograms showing evidence of domoic acid in positive laboratory reference material. i – Matrix peaks ii – Domoic acid iii – epi-domoic acid.

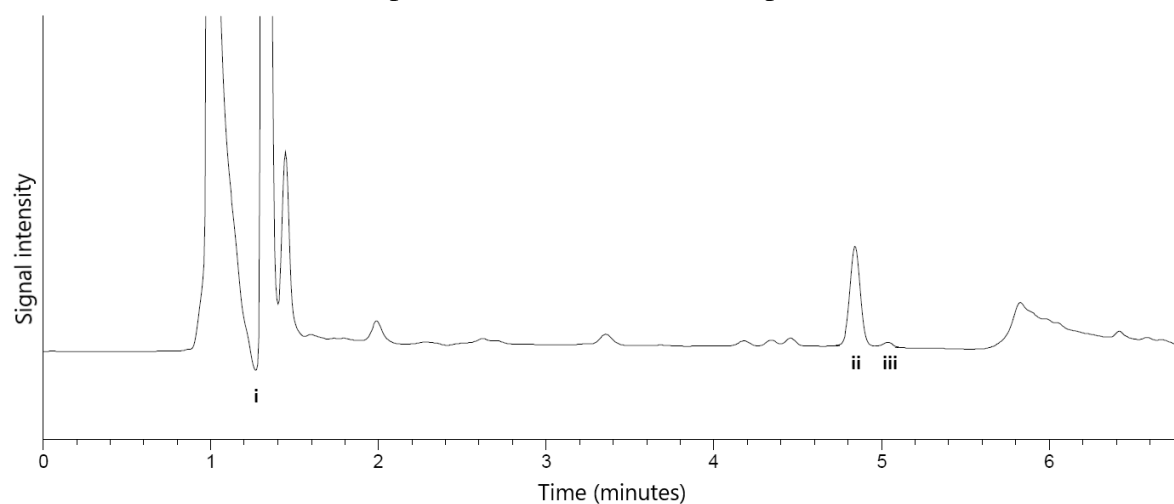

Supplement: s1 [file s1]
